# Supplementary material for: Phylogeny Disambiguates the Evolution of Heat-Shock cis-Regulatory Elements in Drosophila
Source: PLoS One. 2010 May 17;5(5):e10669. doi: 10.1371/journal.pone.0010669 (PMC2871787; doi:10.1371/journal.pone.0010669)
Supplement: Table S1 — Extracted sequences of all HSEs and HSE motifs. All identified HSEs are indicated along with gene and species of origin. Individual motifs that constitute each HSE are also listed. (0.14 MB XLS) [file pone.0010669.s001.xls]

## Sheet: Sheet1
N	Gene	Species	Copy	Element	5'	3'	Size	Sequence	Type	G1	T1	G2	T2	G3	T3	G4	T4	G5	T5	G6
1	hsp22	Dmel	1	1	93	59	7	AGAAAATTCGAGAGAGTGCCGGTATTTTCTAGATT	G	AGAAA	ATTCG	AGAGA	GTGCC	GGTAT	TTTCT	AGATT
2	hsp22	Dmel	1	2	204	175	6	AGAGAGCCCCAGAAACTTCCACGGAGTTCG	G	AGAGA	GCCCC	AGAAA	CTTCC	ACGGA	GTTCG
3	hsp22	Dsim	1	1	93	59	7	AGAAAATTCGAGAGAGTGCCGGCATTTTCTAGATT	G	AGAAA	ATTCG	AGAGA	GTGCC	GGCAT	TTTCT	AGATT
4	hsp22	Dsim	1	2	204	175	6	AGAGAGCCCCAGAAACTTCCACGGAGTTCT	G	AGAGA	GCCCC	AGAAA	CTTCC	ACGGA	GTTCT
5	hsp22	Dsec	1	1	93	59	7	AGAAAATTCGAGAGAGTGCCGGCATTTTCTAGATT	G	AGAAA	ATTCG	AGAGA	GTGCC	GGCAT	TTTCT	AGATT
6	hsp22	Dsec	1	2	204	175	6	AGAGAGCCCCAGAAACTTCCACGGAGTTCG	G	AGAGA	GCCCC	AGAAA	CTTCC	ACGGA	GTTCG
7	hsp22	Dyak	1	1	93	59	7	AGAAAATTCGAGAGAGTGCCGGCATTTTCTAGATT	G	AGAAA	ATTCG	AGAGA	GTGCC	GGCAT	TTTCT	AGATT
8	hsp22	Dyak	1	2	204	175	6	AGAGAGTCGCAGAAACTTCTACAAAGTTCT	G	AGAGA	GTCGC	AGAAA	CTTCT	ACAAA	GTTCT
9	hsp22	Dsan	1	1	93	59	7	AGAAAATTCGAGAGAGTGCCGGCATTTTCTAGATT	G	AGAAA	ATTCG	AGAGA	GTGCC	GGCAT	TTTCT	AGATT
10	hsp22	Dsan	1	2	204	175	6	AGAGAGTCGCAGAAACTTCTACAAAGTTCT	G	AGAGA	GTCGC	AGAAA	CTTCT	ACAAA	GTTCT
11	hsp22	Dere	1	1	93	59	7	AGAAAATTCGAGAGAGTGCCGGCATTTTCTAGATT	G	AGAAA	ATTCG	AGAGA	GTGCC	GGCAT	TTTCT	AGATT
12	hsp22	Dere	1	2	204	175	6	AGAGAGCCCCAGAAACTTCTACGAAGTTCT	G	AGAGA	GCCCC	AGAAA	CTTCT	ACGAA	GTTCT
13	hsp22	Dana	1	1	66	52	3	AATCGAGAAATTTCT	T		AATCG	AGAAA	TTTCT
14	hsp22	Dana	1	2	95	71	5	GGAAAATTCGAGAGGCTACGAGAGA	G	GGAAA	ATTCG	AGAGG	CTACG	AGAGA
15	hsp22	Dana	1	3	206	182	5	AGAGAGTTCTGGTGGCATCAGGAAA	G	AGAGA	GTTCT	GGTGG	CATCA	GGAAA
16	hsp22	Dpse	1	1	77	53	5	CGCCAAGAAAGTTCCGGATGTTTCT	T		CGCCA	AGAAA	GTTCC	GGATG	TTTCT
17	hsp22	Dpse	1	2	172	153	4	GGAGCGCTCTAGAGACATCT	G	GGAGC	GCTCT	AGAGA	CATCT
18	hsp22	Dper	1	1	77	53	5	CGCCAAGAAAGTTCCGGATGTTTCT	T		CGCCA	AGAAA	GTTCC	GGATG	TTTCT
19	hsp22	Dper	1	2	172	153	4	GGAGTGCTCTAGAGACATCT	G	GGAGT	GCTCT	AGAGA	CATCT
20	hsp22	Dwil	1	1	90	61	6	TTTCGAGAGAGAGCTAGATACTTCTAGAGA	T		TTTCG	AGAGA	GAGCT	AGATA	CTTCT	AGAGA
21	hsp22	Dwil	1	2	225	211	3	GTTCTCGGAGCTTCT	T		GTTCT	CGGAG	CTTCT
22	hsp22	Dmoj	1	1	77	48	6	TGTCGGGAGAGTGCGAGAACATTCTCGAAT	T		TGTCG	GGAGA	GTGCG	AGAAC	ATTCT	CGAAT
23	hsp22	Dmoj	1	2	221	207	3	TTTCTTGAAACTTCC	T		TTTCT	TGAAA	CTTCC
24	hsp22	Dvir	1	1	77	48	6	AGTCGAGAGAGCGCCGGAACGTTCTCGAGC	T		AGTCG	AGAGA	GCGCC	GGAAC	GTTCT	CGAGC
25	hsp22	Dvir	1	2	191	172	4	GTACGTGAAATTAATCGAAA	T		GTACG	TGAAA	TTAAT	CGAAA
26	hsp22	Dgri	1	1	99	70	6	GGTCGAGAGAGTGCCGGAAAGTTCTACAAA	T		GGTCG	AGAGA	GTGCC	GGAAA	GTTCT	ACAAA
27	hsp23	Dmel	1	1	151	122	6	GCCCGAGAAGTTTCGTGTCCCTTCTCGATG	T		GCCCG	AGAAG	TTTCG	TGTCC	CTTCT	CGATG
28	hsp23	Dmel	1	2	181	152	6	GGCAAATTCGAGAACTCTGCGATATTTTCA	G	GGCAA	ATTCG	AGAAC	TCTGC	GATAT	TTTCA
29	hsp23	Dmel	1	3	382	363	4	GGAATATACTCCAACCTTCC	G	GGAAT	ATACT	CCAAC	CTTCC
30	hsp23	Dmel	1	4	418	384	7	AGTCTCGAAGTTTCGCGAATTTACTCCATCCTTCG	T		AGTCT	CGAAG	TTTCG	CGAAT	TTACT	CCATC	CTTCG
31	hsp23	Dsim	1	1	151	122	6	GCCCGAGAAGTTTCGTGTCCCTTCTCGATG	T		GCCCG	AGAAG	TTTCG	TGTCC	CTTCT	CGATG
32	hsp23	Dsim	1	2	181	152	6	CGCAAATTCGAGAACTCTGCGATATTTTCA	G	CGCAA	ATTCG	AGAAC	TCTGC	GATAT	TTTCA
33	hsp23	Dsim	1	3	362	343	4	TGAATGTACTCCAACCTTCC	G	TGAAT	GTACT	CCAAC	CTTCC
34	hsp23	Dsim	1	4	398	364	7	AGTCTCGAAGTTTCGCGAATTTTCTCCATCCTTCG	T		AGTCT	CGAAG	TTTCG	CGAAT	TTTCT	CCATC	CTTCG
35	hsp23	Dsec	1	1	151	122	6	GCCCGAGAAGTTTCGTGTCCCTTCTCGATG	T		GCCCG	AGAAG	TTTCG	TGTCC	CTTCT	CGATG
36	hsp23	Dsec	1	2	181	152	6	GGCAAATTCGAGAACTCTGCGATATTTTCA	G	GGCAA	ATTCG	AGAAC	TCTGC	GATAT	TTTCA
37	hsp23	Dsec	1	3	362	343	4	TGAATGTACTCCAACCTTCC	G	TGAAT	GTACT	CCAAC	CTTCC
38	hsp23	Dsec	1	4	398	364	7	AGTCTCGAAGTTTCGAGAATTTTCTCCATCCTTCG	T		AGTCT	CGAAG	TTTCG	AGAAT	TTTCT	CCATC	CTTCG
39	hsp23	Dyak	1	1	145	116	6	GCCCGAGAAGTTTCGTGTCCCTTCTCGATG	T		GCCCG	AGAAG	TTTCG	TGTCC	CTTCT	CGATG
40	hsp23	Dyak	1	2	180	146	7	ATGCCGGCAAATTCGAGAACTCTGCGATATTTTCA	T		ATGCC	GGCAA	ATTCG	AGAAC	TCTGC	GATAT	TTTCA
41	hsp23	Dyak	1	3	348	329	4	GGAATGTACTCCAACCTTCC	G	GGAAT	GTACT	CCAAC	CTTCC
42	hsp23	Dyak	1	4	384	350	7	AGTCTCGAAGTTTCGCGAAAGTGCTCCATCCTCCG	T		AGTCT	CGAAG	TTTCG	CGAAA	GTGCT	CCATC	CTCCG
43	hsp23	Dsan	1	1	147	118	6	GCCCGAGAAGTTTCGTGTCCCTTCTCGATG	T		GCCCG	AGAAG	TTTCG	TGTCC	CTTCT	CGATG
44	hsp23	Dsan	1	2	182	148	7	ATGCCGGCAAATTCGAGAACTCTGCGATATTTTCA	T		ATGCC	GGCAA	ATTCG	AGAAC	TCTGC	GATAT	TTTCA
45	hsp23	Dsan	1	3	350	331	4	GGAATGTACTCCAACCTTCC	G	GGAAT	GTACT	CCAAC	CTTCC
46	hsp23	Dsan	1	4	386	352	7	AGTCTCGAAGTTTCGCGAAAGTGCTCCATCCTCCG	T		AGTCT	CGAAG	TTTCG	CGAAA	GTGCT	CCATC	CTCCG
47	hsp23	Dere	1	1	123	94	6	GCCCGAGAAGTTTCGTGCCCCTTCTCGATG	T		GCCCG	AGAAG	TTTCG	TGCCC	CTTCT	CGATG
48	hsp23	Dere	1	2	158	124	7	ATTCCGGCAAATTCGAGAACTCTGTGATATTTTCA	T		ATTCC	GGCAA	ATTCG	AGAAC	TCTGT	GATAT	TTTCA
49	hsp23	Dere	1	3	314	295	4	GGAATGTACTCCAACCTTCC	G	GGAAT	GTACT	CCAAC	CTTCC
50	hsp23	Dere	1	4	350	316	7	AGTCTCGAAGTTTCGCGAAAGTACTCCATCCTCCG	T		AGTCT	CGAAG	TTTCG	CGAAA	GTACT	CCATC	CTCCG
51	hsp23	Dana	1	1	140	111	6	GACCGAGAAATTTCGTGGCCCTTCTCGGTG	T		GACCG	AGAAA	TTTCG	TGGCC	CTTCT	CGGTG
52	hsp23	Dana	1	2	170	141	6	TGCAAATTCGAGAATGTTGCGATATTTTCA	G	TGCAA	ATTCG	AGAAT	GTTGC	GATAT	TTTCA
53	hsp23	Dana	1	3	347	333	3	GTTCAGCAGCTGTCC	T		GTTCA	GCAGC	TGTCC
54	hsp23	Dana	1	4	385	356	6	AGAATATTCGCGAATAATCTCCATCCTTCG	G	AGAAT	ATTCG	CGAAT	AATCT	CCATC	CTTCG
55	hsp23	Dana	1	5	562	538	5	AATCTAGAATATTCTGGAAATTTCT	T		AATCT	AGAAT	ATTCT	GGAAA	TTTCT
56	hsp23	Dpse	1	1	159	110	10	CGATTCTGCCAGAAAGAGATAGAAGCTTCGTGCAGTTTCTAGATGTTGCC	G	CGATT	CTGCC	AGAAA	GAGAT	AGAAG	CTTCG	TGCAG	TTTCT	AGATG	TTGCC
57	hsp23	Dpse	1	2	170	161	2	CGTAATTTCT	G	CGTAA	TTTCT
58	hsp23	Dpse	1	3	355	336	4	CTTCCAGAATAATCCAGAAC	T		CTTCC	AGAAT	AATCC	AGAAC
59	hsp23	Dpse	1	4	455	431	5	CATCGAGAAAATTCTAGATATTTCC	T		CATCG	AGAAA	ATTCT	AGATA	TTTCC
60	hsp23	Dper	1	1	159	110	10	CGATTCTGCCAGAAAGAGATAGAAGCTTCGTGCAGTTTCTAGATGTTGCC	G	CGATT	CTGCC	AGAAA	GAGAT	AGAAG	CTTCG	TGCAG	TTTCT	AGATG	TTGCC
61	hsp23	Dper	1	2	170	161	2	CGTAATTTCT	G	CGTAA	TTTCT
62	hsp23	Dper	1	3	355	336	4	CTTCCAGAATAATCCAGAAC	T		CTTCC	AGAAT	AATCC	AGAAC
63	hsp23	Dper	1	4	516	492	5	CATCGAGAAAATTCTAGATATTTCC	T		CATCG	AGAAA	ATTCT	AGATA	TTTCC
64	hsp23	Dper	2	1	159	110	10	CGATTCTGCCAGAAAGAGATAGAAGCTTCGTGCAGTTTCTAGATGTTGCC	G	CGATT	CTGCC	AGAAA	GAGAT	AGAAG	CTTCG	TGCAG	TTTCT	AGATG	TTGCC
65	hsp23	Dper	2	2	170	161	2	CGTAATTTCT	G	CGTAA	TTTCT
66	hsp23	Dper	2	3	355	336	4	ATTCCAGAATAATCCAGAAC	T		ATTCC	AGAAT	AATCC	AGAAC
67	hsp23	Dper	2	4	455	431	5	CATCGAAAAAATTCTAGATATTTCC	T		CATCG	AAAAA	ATTCT	AGATA	TTTCC
68	hsp23	Dwil	1	1	166	137	6	AGTTTTGACTACGCATGTGACGACAATTCT	G	AGTTT	TGACT	ACGCA	TGTGA	CGACA	ATTCT
69	hsp23	Dmoj	1	1	149	130	4	AGCCAGAGCCAGAAGTTTCC	G	AGCCA	GAGCC	AGAAG	TTTCC
70	hsp23	Dmoj	1	2	191	172	4	ATTCGAGCGCTTTCCAGAAC	T		ATTCG	AGCGC	TTTCC	AGAAC
71	hsp23	Dmoj	1	3	420	396	5	TATCTGGAAAGTTACAGAACATTCT	T		TATCT	GGAAA	GTTAC	AGAAC	ATTCT
72	hsp23	Dvir	1	1	132	108	5	ACACTAGCCAGAGCCAGAAGTTTCG	T		ACACT	AGCCA	GAGCC	AGAAG	TTTCG
73	hsp23	Dvir	1	2	169	140	6	ATTCGAGCAATTTCCAGAACATTTCAGAAA	T		ATTCG	AGCAA	TTTCC	AGAAC	ATTTC	AGAAA
74	hsp23	Dgri	1	1	121	107	3	GAGCTAGAACTTTCG	T		GAGCT	AGAAC	TTTCG
75	hsp23	Dgri	1	2	148	129	4	TTTCGAGCGATTTCGAGAAC	T		TTTCG	AGCGA	TTTCG	AGAAC
76	hsp26	Dmel	1	1	73	44	6	TTTCTGTCACTTTCCGGACTCTTCTAGAAA	T		TTTCT	GTCAC	TTTCC	GGACT	CTTCT	AGAAA
77	hsp26	Dmel	1	2	352	338	3	TCTCTAGAAACTTCG	T		TCTCT	AGAAA	CTTCG
78	hsp26	Dmel	1	3	373	364	2	TTTCTAGAAA	T		TTTCT	AGAAA
79	hsp26	Dsim	1	1	73	44	6	TTTCTGTCACTTTCCGGACTCTTCTAGAAA	T		TTTCT	GTCAC	TTTCC	GGACT	CTTCT	AGAAA
80	hsp26	Dsim	1	2	349	335	3	TCTCTAGAAACTTCG	T		TCTCT	AGAAA	CTTCG
81	hsp26	Dsim	1	3	370	361	2	TTTCTAGAAA	T		TTTCT	AGAAA
82	hsp26	Dsec	1	1	75	56	4	TTTCTGTCACTTTCCGGAAA	T		TTTCT	GTCAC	TTTCC	GGAAA
83	hsp26	Dsec	1	2	366	352	3	TCTCTAAAAACTTCG	T		TCTCT	AAAAA	CTTCG
84	hsp26	Dsec	1	3	387	378	2	TTTCTAGAAA	T		TTTCT	AGAAA
85	hsp26	Dyak	1	1	73	44	6	TTTCTGTCACATTCCGGACTCTTCTAGAAA	T		TTTCT	GTCAC	ATTCC	GGACT	CTTCT	AGAAA
86	hsp26	Dyak	1	2	360	346	3	TCTCTAGAAACTTCG	T		TCTCT	AGAAA	CTTCG
87	hsp26	Dyak	1	3	381	372	2	TTTCTAGAAA	T		TTTCT	AGAAA
88	hsp26	Dsan	1	1	73	44	6	TTTCTGTCACATTCCGGACTCTTCTAGAAA	T		TTTCT	GTCAC	ATTCC	GGACT	CTTCT	AGAAA
89	hsp26	Dsan	1	2	357	343	3	TCTCTAGAAACTTCG	T		TCTCT	AGAAA	CTTCG
90	hsp26	Dsan	1	3	378	369	2	TTTCTAGAAA	T		TTTCT	AGAAA
91	hsp26	Dere	1	1	73	44	6	TTTCTGTCACTTTCTGGACTTTTCTAGAAG	T		TTTCT	GTCAC	TTTCT	GGACT	TTTCT	AGAAG
92	hsp26	Dere	1	2	335	321	3	TCTCTAGAAACTTCG	T		TCTCT	AGAAA	CTTCG
93	hsp26	Dere	1	3	355	341	3	TTTCTAGAAAATGCA	T		TTTCT	AGAAA	ATGCA
94	hsp26	Dana	1	1	77	43	7	CGACCTCTCTCGTATTTGCCAGCTTTTTCTAGAAG	G	CGACC	TCTCT	CGTAT	TTGCC	AGCTT	TTTCT	AGAAG
95	hsp26	Dpse	1	1	70	41	6	CTCCCAGAAACTGCCAGACGCTTCTAGAAG	T		CTCCC	AGAAA	CTGCC	AGACG	CTTCT	AGAAG
96	hsp26	Dper	1	1	70	41	6	CTCCCAGAAACTGCCAGACGCTTCTAGAAG	T		CTCCC	AGAAA	CTGCC	AGACG	CTTCT	AGAAG
97	hsp26	Dwil	1	1	69	40	6	ATTCTAGCAGAGGGTGGACTCTTCTAGAAG	T		ATTCT	AGCAG	AGGGT	GGACT	CTTCT	AGAAG
98	hsp26	Dwil	1	2	516	487	6	ATTCTAGCAGAGGGTGGACTCTTCTAGAAG	T		ATTCT	AGCAG	AGGGT	GGACT	CTTCT	AGAAG
99	hsp26	Dmoj	1	1	58	34	5	CGTAAAAGCTCGATGCTTCTAGAAA	G	CGTAA	AAGCT	CGATG	CTTCT	AGAAA
100	hsp26	Dmoj	2	1	62	33	6	GCTCTAGCAATTGAGCGATGTTTTCAGAAG	T		GCTCT	AGCAA	TTGAG	CGATG	TTTTC	AGAAG
101	hsp26	Dvir	1	1	60	36	5	AGCAATAGCTCGATATTTCTAGAAA	G	AGCAA	TAGCT	CGATA	TTTCT	AGAAA
102	hsp26	Dvir	1	2	128	104	5	ACTCTCGCAAGCTCGCGATGTTTCT	T		ACTCT	CGCAA	GCTCG	CGATG	TTTCT
103	hsp26	Dvir	2	1	64	35	6	TCTCTAGACTCTGCGCGATGTTTCCAGAAG	T		TCTCT	AGACT	CTGCG	CGATG	TTTCC	AGAAG
104	hsp26	Dgri	1	1	44	30	3	CGATGTTTCTGGAAG	G	CGATG	TTTCT	GGAAG
105	hsp27	Dmel	1	1	299	270	6	GTGCTAGAAAGAGCCAGAAGATGCGAGAGA	T		GTGCT	AGAAA	GAGCC	AGAAG	ATGCG	AGAGA
106	hsp27	Dmel	1	2	353	324	6	AGAAATGTCAAGAAGTTTCTGGTTCTTTCT	G	AGAAA	TGTCA	AGAAG	TTTCT	GGTTC	TTTCT
107	hsp27	Dmel	1	3	369	360	2	AGAAACTCCC	G	AGAAA	CTCCC
108	hsp27	Dsim	1	1	298	274	5	AGAAAGAGCCAGAAGATGCGAGAGA	G	AGAAA	GAGCC	AGAAG	ATGCG	AGAGA
109	hsp27	Dsim	1	2	357	328	6	AGAAATGTCAAGAAGTTTCTGGTTCTTTCT	G	AGAAA	TGTCA	AGAAG	TTTCT	GGTTC	TTTCT
110	hsp27	Dsim	1	3	372	358	3	AGAAACTCCCAGAAA	G	AGAAA	CTCCC	AGAAA
111	hsp27	Dsec	1	1	294	270	5	AGAAAGAGCCAGAAGATGCGAGAGA	G	AGAAA	GAGCC	AGAAG	ATGCG	AGAGA
112	hsp27	Dsec	1	2	353	324	6	AGAAATGTCAAGAAGTTTCTGGTTCTTTCT	G	AGAAA	TGTCA	AGAAG	TTTCT	GGTTC	TTTCT
113	hsp27	Dsec	1	3	368	354	3	AGAAACTCCCAGAAA	G	AGAAA	CTCCC	AGAAA
114	hsp27	Dyak	1	1	323	294	6	GTGCTAGAAAGAGCCAGAAGGTGCGAGAGA	T		GTGCT	AGAAA	GAGCC	AGAAG	GTGCG	AGAGA
115	hsp27	Dyak	1	2	377	348	6	AGAAATGTCAAGAACTTTCTGGCGCCCTCT	G	AGAAA	TGTCA	AGAAC	TTTCT	GGCGC	CCTCT
116	hsp27	Dyak	1	3	392	378	3	AGAAACTCCCATAAA	G	AGAAA	CTCCC	ATAAA
117	hsp27	Dsan	1	1	319	290	6	GTGCTAGAAAGAGCCAGAAGGTGCGAGAAC	T		GTGCT	AGAAA	GAGCC	AGAAG	GTGCG	AGAAC
118	hsp27	Dsan	1	2	373	344	6	AGAAATGTCAAGAACTTTCTGGCGCCCTCT	G	AGAAA	TGTCA	AGAAC	TTTCT	GGCGC	CCTCT
119	hsp27	Dsan	1	3	388	374	3	AGAAACTCCCAGAAA	G	AGAAA	CTCCC	AGAAA
120	hsp27	Dere	1	1	324	295	6	GTGCTAGAAAGAGCCAGAACATGCGAGAGA	T		GTGCT	AGAAA	GAGCC	AGAAC	ATGCG	AGAGA
121	hsp27	Dere	1	2	378	349	6	AGAAAAGTCAAGAACTTTCTAGCGCCCTCT	G	AGAAA	AGTCA	AGAAC	TTTCT	AGCGC	CCTCT
122	hsp27	Dere	1	3	393	379	3	AGAAACAGCCAGAAA	G	AGAAA	CAGCC	AGAAA
123	hsp27	Dana	1	1	115	66	10	GCGCCAGAAAGAGCTAGAACTTGCGAGAGAGCTAAAGAGAGAACGAGAAC	T		GCGCC	AGAAA	GAGCT	AGAAC	TTGCG	AGAGA	GCTAA	AGAGA	GAACG	AGAAC
124	hsp27	Dana	1	2	209	185	5	AGAAGGTCCCAGAAAATGCAAAAAT	G	AGAAG	GTCCC	AGAAA	ATGCA	AAAAT
125	hsp27	Dpse	1	1	126	77	10	GTGCCAGAAAGAGCGCGAAGCTTCCACAGAGCGCGAGAGAGAACGAGAAA	T		GTGCC	AGAAA	GAGCG	CGAAG	CTTCC	ACAGA	GCGCG	AGAGA	GAACG	AGAAA
126	hsp27	Dpse	1	2	201	172	6	AGAATCTCCCAGAAATTGCAAGAACTTTCT	G	AGAAT	CTCCC	AGAAA	TTGCA	AGAAC	TTTCT
127	hsp27	Dper	1	1	126	77	10	GTGCCAGAAAGAGCGCGAAGCTTCCACAGAGCGCGAGAGAGAACGAGAAA	T		GTGCC	AGAAA	GAGCG	CGAAG	CTTCC	ACAGA	GCGCG	AGAGA	GAACG	AGAAA
128	hsp27	Dper	1	2	195	166	6	AGAATCTCCCAGAAATTGCAAGAACTTTCT	G	AGAAT	CTCCC	AGAAA	TTGCA	AGAAC	TTTCT
129	hsp27	Dper	2	1	126	77	10	GTGCCAGAAAGAGCGCGAAGCTTCCACAGAGCGCGAGAGAGAACGAGAAA	T		GTGCC	AGAAA	GAGCG	CGAAG	CTTCC	ACAGA	GCGCG	AGAGA	GAACG	AGAAA
130	hsp27	Dper	2	2	201	172	6	AGAATCTCCCAGAAATTGCAAGAACTTTCT	G	AGAAT	CTCCC	AGAAA	TTGCA	AGAAC	TTTCT
131	hsp27	Dwil	1	1	120	81	8	TCGCGAGAAGCTTTGAGAAATTTCGAGAGAGAGCGAGAAC	T		TCGCG	AGAAG	CTTTG	AGAAA	TTTCG	AGAGA	GAGCG	AGAAC
132	hsp27	Dwil	1	2	141	122	4	TTTCGAGTTAGTTCGGGAAG	T		TTTCG	AGTTA	GTTCG	GGAAG
133	hsp27	Dwil	1	3	242	218	5	AGAACTTTGCAGAAATTGCAAGAAT	G	AGAAC	TTTGC	AGAAA	TTGCA	AGAAT
134	hsp27	Dmoj	1	1	115	76	8	AGAAAGAGCGAGTAAATTCAAGAGCGAACGAGAACAATCA	G	AGAAA	GAGCG	AGTAA	ATTCA	AGAGC	GAACG	AGAAC	AATCA
135	hsp27	Dmoj	1	2	225	201	5	AGAAATTTCAAGAAACTGGTAGATT	G	AGAAA	TTTCA	AGAAA	CTGGT	AGATT
136	hsp27	Dvir	1	1	115	81	7	AGAAAGAGCGAGTAAGTTCAAGAGTGAAAAAGCAA	G	AGAAA	GAGCG	AGTAA	GTTCA	AGAGT	GAAAA	AGCAA
137	hsp27	Dvir	1	2	186	162	5	TGAGAGAGCCAGAAAGATCGAGAGA	G	TGAGA	GAGCC	AGAAA	GATCG	AGAGA
138	hsp27	Dvir	1	3	221	192	6	AGAAACTCCAAGAAATTGCAAGAACTTTCC	G	AGAAA	CTCCA	AGAAA	TTGCA	AGAAC	TTTCC
139	hsp27	Dgri	1	1	122	88	7	AGAAAGAGCGAGAATTTTCAAGAGCACAACAGCAA	G	AGAAA	GAGCG	AGAAT	TTTCA	AGAGC	ACAAC	AGCAA
140	hsp27	Dgri	1	2	153	129	5	AGAAAGAGCGAGAAACTTCAAGCAT	G	AGAAA	GAGCG	AGAAA	CTTCA	AGCAT
141	hsp40	Dmel	1	1	97	53	9	TTTCGAGATACAACCCTAAAATCCGAGAAGCATCCAGAAATTTCG	T		TTTCG	AGATA	CAACC	CTAAA	ATCCG	AGAAG	CATCC	AGAAA	TTTCG
142	hsp40	Dmel	1	2	364	355	2	ATTCCAGAAC	T		ATTCC	AGAAC
143	hsp40	Dmel	1	3	385	366	4	CTTCGCAGACTTACACGAAA	T		CTTCG	CAGAC	TTACA	CGAAA
144	hsp40	Dsim	1	1	97	53	9	TTTCGAGATACAACCCTAAAAACCGAGAAGCATCCAGAAATTTCG	T		TTTCG	AGATA	CAACC	CTAAA	AACCG	AGAAG	CATCC	AGAAA	TTTCG
145	hsp40	Dsim	1	2	270	261	2	ATTCCAGAAC	T		ATTCC	AGAAC
146	hsp40	Dsim	1	3	291	272	4	ATTCGAGGACTTTCACGAAT	T		ATTCG	AGGAC	TTTCA	CGAAT
147	hsp40	Dsec	1	1	97	53	9	TTTCGAGATACAACCCTAAAAACCGAGAAGCATCCAGAAATTTCG	T		TTTCG	AGATA	CAACC	CTAAA	AACCG	AGAAG	CATCC	AGAAA	TTTCG
148	hsp40	Dsec	1	2	301	292	2	ATTCCAGAAC	T		ATTCC	AGAAC
149	hsp40	Dsec	1	3	322	303	4	ATTCGAGGACTTTCACGAAT	T		ATTCG	AGGAC	TTTCA	CGAAT
150	hsp40	Dyak	1	1	97	53	9	TTTCGAGATACAACCCTAAACGACGAGAAGCATCCAGAAACTTCG	T		TTTCG	AGATA	CAACC	CTAAA	CGACG	AGAAG	CATCC	AGAAA	CTTCG
151	hsp40	Dyak	1	2	198	189	2	ATTCCAGAAC	T		ATTCC	AGAAC
152	hsp40	Dyak	1	3	219	200	4	ATTCGCGGTCTTTCAGGAAA	T		ATTCG	CGGTC	TTTCA	GGAAA
153	hsp40	Dsan	1	1	97	53	9	TTTCGAGATACAACCCTAAACGACGAGAAGCATCCAGAAACTTCG	T		TTTCG	AGATA	CAACC	CTAAA	CGACG	AGAAG	CATCC	AGAAA	CTTCG
154	hsp40	Dsan	1	2	198	189	2	ATTCCAGAAC	T		ATTCC	AGAAC
155	hsp40	Dsan	1	3	219	200	4	ATTCGCGACCTTTCAGGAAA	T		ATTCG	CGACC	TTTCA	GGAAA
156	hsp40	Dere	1	1	97	53	9	GTTCGAGATACAACCCTAAAAAACGAGAATCATCCAGAAACTTCG	T		GTTCG	AGATA	CAACC	CTAAA	AAACG	AGAAT	CATCC	AGAAA	CTTCG
157	hsp40	Dere	1	2	179	170	2	CGATAGTTCT	G	CGATA	GTTCT
158	hsp40	Dere	1	3	189	180	2	CATCCAGAAC	T		CATCC	AGAAC
159	hsp40	Dana	1	1	89	45	9	CTTCCCGATAATACCCTAAATCGCGAGAAACGACGAGAAGCTTCG	T		CTTCC	CGATA	ATACC	CTAAA	TCGCG	AGAAA	CGACG	AGAAG	CTTCG
160	hsp40	Dana	1	2	180	161	4	GGAAATAATAAGAAAATTCC	G	GGAAA	TAATA	AGAAA	ATTCC
161	hsp40	Dpse	1	1	84	50	7	GTTCTCCAAGCAGCGAGAAACATCGAGAAAATTCG	T		GTTCT	CCAAG	CAGCG	AGAAA	CATCG	AGAAA	ATTCG
162	hsp40	Dpse	1	2	427	413	3	GGACCATTCTTGAAC	G	GGACC	ATTCT	TGAAC
163	hsp40	Dper	1	1	84	50	7	GTTCTCCAAGCAGCGAGAAACATCGAGAAAATTCG	T		GTTCT	CCAAG	CAGCG	AGAAA	CATCG	AGAAA	ATTCG
164	hsp40	Dper	1	2	428	414	3	GGACCATTCTTGAAC	G	GGACC	ATTCT	TGAAC
165	hsp40	Dwil	1	1	97	53	9	TTTCCAGATGCATCCCTGCGCATCTGGAACGTTCAAGAACATTCG	T		TTTCC	AGATG	CATCC	CTGCG	CATCT	GGAAC	GTTCA	AGAAC	ATTCG
166	hsp40	Dmoj	1	1	98	54	9	TTTCCGGATGCAACCCTACTTTGCTAGAAGCATCGAGAATTTTCG	T		TTTCC	GGATG	CAACC	CTACT	TTGCT	AGAAG	CATCG	AGAAT	TTTCG
167	hsp40	Dvir	1	1	98	54	9	GTTCCGGATGCAACCCTATTATGCTAGAAGCATCGAGAATTTTCG	T		GTTCC	GGATG	CAACC	CTATT	ATGCT	AGAAG	CATCG	AGAAT	TTTCG
168	hsp40	Dgri	1	1	98	54	9	ATTCCGGATGCAACCCTACCTTACGAGAAGCATCGAGAATTTTCG	T		ATTCC	GGATG	CAACC	CTACC	TTACG	AGAAG	CATCG	AGAAT	TTTCG
169	hsp40	Dgri	1	2	319	305	3	AGATTATTCACGAGA	G	AGATT	ATTCA	CGAGA
170	hsp68	Dmel	1	1	61	47	3	AATCTCGAATTTTCC	T		AATCT	CGAAT	TTTCC
171	hsp68	Dmel	1	2	99	65	7	CGAACTGACTGGAATGTTCTGACCCTTTCTCGCAG	G	CGAAC	TGACT	GGAAT	GTTCT	GACCC	TTTCT	CGCAG
172	hsp68	Dmel	1	3	185	161	5	TTTCTCGAAATTTCCTGAACTTTCA	T		TTTCT	CGAAA	TTTCC	TGAAC	TTTCA
173	hsp68	Dsim	1	1	61	47	3	AATCTCGAATTTTCC	T		AATCT	CGAAT	TTTCC
174	hsp68	Dsim	1	2	99	65	7	CGAACTGACTCGAATGTTCTGGCCCTTTCTCGCAG	G	CGAAC	TGACT	CGAAT	GTTCT	GGCCC	TTTCT	CGCAG
175	hsp68	Dsim	1	3	185	166	4	GCTCTCGAATTTTCCTGAAC	T		GCTCT	CGAAT	TTTCC	TGAAC
176	hsp68	Dsec	1	1	61	47	3	AATCTCGAATTTTCC	T		AATCT	CGAAT	TTTCC
177	hsp68	Dsec	1	2	99	65	7	CGAACTGACTGGAATGTTCTGGCCCTTTCTCGCAG	G	CGAAC	TGACT	GGAAT	GTTCT	GGCCC	TTTCT	CGCAG
178	hsp68	Dsec	1	3	185	166	4	GCTCTCGAATTTTCCTGAAC	T		GCTCT	CGAAT	TTTCC	TGAAC
179	hsp68	Dyak	1	1	66	52	3	AATCTCGAATTTTCC	T		AATCT	CGAAT	TTTCC
180	hsp68	Dyak	1	2	99	70	6	CTACTGGAATGTTCTGGCCTTTTCTCGCAG	T		CTACT	GGAAT	GTTCT	GGCCT	TTTCT	CGCAG
181	hsp68	Dyak	1	3	180	156	5	TCCCTCGATTGTTCCTGAACTTTCT	T		TCCCT	CGATT	GTTCC	TGAAC	TTTCT
182	hsp68	Dsan	1	1	66	52	3	AATCTCGAATTTTCC	T		AATCT	CGAAT	TTTCC
183	hsp68	Dsan	1	2	99	70	6	TGACTGGAATGTTCTGGCCCTTTCTCGCAG	T		TGACT	GGAAT	GTTCT	GGCCC	TTTCT	CGCAG
184	hsp68	Dsan	1	3	191	167	5	TCCCTCGATTGTTCCTGAACTTTCT	T		TCCCT	CGATT	GTTCC	TGAAC	TTTCT
185	hsp68	Dere	1	1	61	47	3	AATCTCGAATTTTCC	T		AATCT	CGAAT	TTTCC
186	hsp68	Dere	1	2	99	65	7	CGAACTGACTGGAATGTTCTGGCCTTTTCTCGCAG	G	CGAAC	TGACT	GGAAT	GTTCT	GGCCT	TTTCT	CGCAG
187	hsp68	Dere	1	3	185	161	5	TCCCTCAATTGTTCCTGAACTTTCT	T		TCCCT	CAATT	GTTCC	TGAAC	TTTCT
188	hsp68	Dana	1	1	62	48	3	AATCTCGAATTTTCC	T		AATCT	CGAAT	TTTCC
189	hsp68	Dana	1	2	90	66	5	GGAAACGTCGTGAGACTTCGAGAAG	G	GGAAA	CGTCG	TGAGA	CTTCG	AGAAG
190	hsp68	Dana	1	3	149	125	5	CCCCTCAATTGTTCCTGAATTTTCC	T		CCCCT	CAATT	GTTCC	TGAAT	TTTCC
191	hsp68	Dpse	1	1	109	55	11	CGCACTCTCGCGAAACTTCGAGAATCATCGCGAACGTTCTCCCCTCTTCTGGCAA	G	CGCAC	TCTCG	CGAAA	CTTCG	AGAAT	CATCG	CGAAC	GTTCT	CCCCT	CTTCT	GGCAA
192	hsp68	Dpse	1	2	253	239	3	ATTCTTGAATTTTCC	T		ATTCT	TGAAT	TTTCC
193	hsp68	Dpse	2	1	109	55	11	CGCACTCTCGCGAAACTTCGAGAATCATCGCGAACGTTCTCCCCTCTTCTGGCAA	G	CGCAC	TCTCG	CGAAA	CTTCG	AGAAT	CATCG	CGAAC	GTTCT	CCCCT	CTTCT	GGCAA
194	hsp68	Dpse	2	2	253	239	3	ATTCTTGAATTTTCC	T		ATTCT	TGAAT	TTTCC
195	hsp68	Dper	1	1	109	55	11	CGCACTCTCGCGAAACTTCGCGAATCATCGCGAACGTTCTCCCCTCTTCTGGCAA	G	CGCAC	TCTCG	CGAAA	CTTCG	CGAAT	CATCG	CGAAC	GTTCT	CCCCT	CTTCT	GGCAA
196	hsp68	Dper	1	2	253	239	3	ATTCTTGAATTTTCC	T		ATTCT	TGAAT	TTTCC
197	hsp68	Dper	2	1	109	55	11	CGCACTCTCGCGAAACTTCGCGAATCATCGCGAACGTTCTCCCCTCTTCTGGCAA	G	CGCAC	TCTCG	CGAAA	CTTCG	CGAAT	CATCG	CGAAC	GTTCT	CCCCT	CTTCT	GGCAA
198	hsp68	Dper	2	2	253	239	3	ATTCTTGAATTTTCC	T		ATTCT	TGAAT	TTTCC
199	hsp68	Dmoj	1	1	62	48	3	AATCTCGAAATTTCC	T		AATCT	CGAAA	TTTCC
200	hsp68	Dmoj	1	2	97	78	4	CGAATTGCCTCGAACATTCT	G	CGAAT	TGCCT	CGAAC	ATTCT
201	hsp68	Dvir	1	1	62	48	3	AATCTCGAATATTCC	T		AATCT	CGAAT	ATTCC
202	hsp68	Dvir	1	2	108	84	5	CGCACTCTCTCGAATCGTCTGGAGT	G	CGCAC	TCTCT	CGAAT	CGTCT	GGAGT
203	hsp68	Dvir	2	1	63	49	3	AATCTCGAATATTCC	T		AATCT	CGAAT	ATTCC
204	hsp68	Dvir	2	2	122	73	10	AGTAATGTCTGGCAGTCTCTCGAATCGTCTCGAACCTTCTGCACTCTTCT	G	AGTAA	TGTCT	GGCAG	TCTCT	CGAAT	CGTCT	CGAAC	CTTCT	GCACT	CTTCT
205	hsp68	Dgri	1	1	63	49	3	TATCTCGAAATTTCC	T		TATCT	CGAAA	TTTCC
206	hsp68	Dgri	1	2	112	68	9	CGCACTTTCCTGAATCGTCTCGAACATTCTGCACTGTTCTTGTAA	G	CGCAC	TTTCC	TGAAT	CGTCT	CGAAC	ATTCT	GCACT	GTTCT	TGTAA
207	hsp68	Dgri	2	1	63	49	3	TATCTCAAAATTTCC	T		TATCT	CAAAA	TTTCC
208	hsp68	Dgri	2	2	112	68	9	CGCACTTTTCTGAAGCGTCTTGAACATTCTGCACTGTTCTTGTAA	G	CGCAC	TTTTC	TGAAG	CGTCT	TGAAC	ATTCT	GCACT	GTTCT	TGTAA
209	Hsp70Aa	Dmel	1	1	65	46	4	CGCCTCGAATGTTCGCGAAA	T		CGCCT	CGAAT	GTTCG	CGAAA
210	Hsp70Aa	Dmel	1	2	88	69	4	GTTCTCGTTGCTTCGAGAGA	T		GTTCT	CGTTG	CTTCG	AGAGA
211	Hsp70Aa	Dmel	1	3	192	173	4	AGAAAACTCGAGAAATTTCT	G	AGAAA	ACTCG	AGAAA	TTTCT
212	Hsp70Aa	Dmel	1	4	252	238	3	CGAATATTCTAGAAT	G	CGAAT	ATTCT	AGAAT
213	Hsp70Ab	Dmel	1	1	65	46	4	CGCCTCGAATGTTCGCGAAA	T		CGCCT	CGAAT	GTTCG	CGAAA
214	Hsp70Ab	Dmel	1	2	88	69	4	GTTCTCGTTGCTTCGAGAGA	T		GTTCT	CGTTG	CTTCG	AGAGA
215	Hsp70Ab	Dmel	1	3	192	173	4	AGAAAACTCGAGAAATTTCT	G	AGAAA	ACTCG	AGAAA	TTTCT
216	Hsp70Ab	Dmel	1	4	252	238	3	CGAATATTCTAGAAT	G	CGAAT	ATTCT	AGAAT
217	Hsp70Ba	Dmel	1	1	65	46	4	CGCCTCGAATGTTCGCGAAA	T		CGCCT	CGAAT	GTTCG	CGAAA
218	Hsp70Ba	Dmel	1	2	88	69	4	GCTCTCGTTGGTTCGAGAGA	T		GCTCT	CGTTG	GTTCG	AGAGA
219	Hsp70Ba	Dmel	1	3	201	182	4	AGAAAACTCGAGAAATTTCT	G	AGAAA	ACTCG	AGAAA	TTTCT
220	Hsp70Ba	Dmel	1	4	261	247	3	CGAATATTCTAGAAT	G	CGAAT	ATTCT	AGAAT
221	Hsp70Bb	Dmel	1	1	65	46	4	CGCCTCGAATGTTCGCGAAA	T		CGCCT	CGAAT	GTTCG	CGAAA
222	Hsp70Bb	Dmel	1	2	88	69	4	GCTCTCGTTGGTTCGAGAGA	T		GCTCT	CGTTG	GTTCG	AGAGA
223	Hsp70Bb	Dmel	1	3	201	182	4	AGAAAACTCGAGAAATTTCT	G	AGAAA	ACTCG	AGAAA	TTTCT
224	Hsp70Bb	Dmel	1	4	261	247	3	CGAATATTCTAGAAT	G	CGAAT	ATTCT	AGAAT
225	Hsp70Bbb	Dmel	1	1	65	46	4	CGCCTCGAATGTTCGCGAAA	T		CGCCT	CGAAT	GTTCG	CGAAA
226	Hsp70Bbb	Dmel	1	2	88	69	4	GCTCTCGTTGGTTCGAGAGA	T		GCTCT	CGTTG	GTTCG	AGAGA
227	Hsp70Bbb	Dmel	1	3	201	182	4	AGAAAACTCGAGAAATTTCT	G	AGAAA	ACTCG	AGAAA	TTTCT
228	Hsp70Bbb	Dmel	1	4	261	247	3	CGAATATTCTAGAAT	G	CGAAT	ATTCT	AGAAT
229	Hsp70Bc	Dmel	1	1	65	46	4	CGCCTCGAATGTTCGCGAAA	T		CGCCT	CGAAT	GTTCG	CGAAA
230	Hsp70Bc	Dmel	1	2	88	69	4	GCTCTCGTTGGTTCGAGAGA	T		GCTCT	CGTTG	GTTCG	AGAGA
231	Hsp70Bc	Dmel	1	3	201	182	4	AGAAAACTCGAGAAATTTCT	G	AGAAA	ACTCG	AGAAA	TTTCT
232	Hsp70Bc	Dmel	1	4	261	247	3	CGAATATTCTAGAAT	G	CGAAT	ATTCT	AGAAT
233	Hsp70	Dsim	1(A)	1	66	47	4	CGACTCGAATGTTCGCGAAA	T		CGACT	CGAAT	GTTCG	CGAAA
234	Hsp70	Dsim	1(A)	2	89	70	4	GTTCTCGTTGCTTCGAGAGA	T		GTTCT	CGTTG	CTTCG	AGAGA
235	Hsp70	Dsim	1(A)	3	193	174	4	AGAAAACTCGAGAAATTTCT	G	AGAAA	ACTCG	AGAAA	TTTCT
236	Hsp70	Dsim	1(A)	4	253	239	3	CGAAAATTCTAGAAT	G	CGAAA	ATTCT	AGAAT
237	Hsp70	Dsim	2(B)	1	66	47	4	CGCCTCGAATGTTCGCGAAA	T		CGCCT	CGAAT	GTTCG	CGAAA
238	Hsp70	Dsim	2(B)	2	89	70	4	GTTCTCGTTGCTTCGAGAGA	T		GTTCT	CGTTG	CTTCG	AGAGA
239	Hsp70	Dsim	2(B)	3	193	174	4	AGAAAACTCGAGAAATTTCT	G	AGAAA	ACTCG	AGAAA	TTTCT
240	Hsp70	Dsim	2(B)	4	253	239	3	CGAAATTTCTAGAAT	G	CGAAA	TTTCT	AGAAT
241	Hsp70	Dsim	3(C)	1	66	47	4	CGCCTCGAATGTTCGCGAAA	T		CGCCT	CGAAT	GTTCG	CGAAA
242	Hsp70	Dsim	3(C)	2	89	70	4	GTTCTCGTTGCTTCGAGAGA	T		GTTCT	CGTTG	CTTCG	AGAGA
243	Hsp70	Dsim	3(C)	3	193	174	4	AGAAAACTCGAGAAATTTCT	G	AGAAA	ACTCG	AGAAA	TTTCT
244	Hsp70	Dsim	3(C)	4	253	239	3	CGAAATTTCTAGAAT	G	CGAAA	TTTCT	AGAAT
245	Hsp70	Dsec	1(A)	1	66	47	4	CGCCTCGAATGTTCGCGAAA	T		CGCCT	CGAAT	GTTCG	CGAAA
246	Hsp70	Dsec	1(A)	2	89	70	4	GTTCTCGTTGCTTCGAGAGA	T		GTTCT	CGTTG	CTTCG	AGAGA
247	Hsp70	Dsec	1(A)	3	192	178	3	AGAAAACTCGCGAAA	G	AGAAA	ACTCG	CGAAA
248	Hsp70	Dsec	1(A)	4	247	238	2	TTTCTAGAAT	T		TTTCT	AGAAT
249	Hsp70	Dsec	2(B)	1	66	47	4	CGCCTCGAATGTTCGCGAAA	T		CGCCT	CGAAT	GTTCG	CGAAA
250	Hsp70	Dsec	2(B)	2	89	70	4	GTTCTCGTTGCTTCGAGAGA	T		GTTCT	CGTTG	CTTCG	AGAGA
251	Hsp70	Dsec	2(B)	3	192	178	3	AGAAAACTCGCGAAA	G	AGAAA	ACTCG	CGAAA
252	Hsp70	Dsec	2(B)	4	252	238	3	CGAATTTTCTAGAAT	G	CGAAT	TTTCT	AGAAT
253	Hsp70	Dsec	3(C)	1	65	46	4	CGCCTCGAATGTTCGCGAAA	T		CGCCT	CGAAT	GTTCG	CGAAA
254	Hsp70	Dsec	3(C)	2	88	69	4	GTTCTCGTTGCTTCGAGAGA	T		GTTCT	CGTTG	CTTCG	AGAGA
255	Hsp70	Dsec	3(C)	3	191	177	3	AGAAAACTCGCGAAA	G	AGAAA	ACTCG	CGAAA
256	Hsp70	Dsec	3(C)	4	251	237	3	CGAAATTTCTAGAAT	G	CGAAA	TTTCT	AGAAT
257	Hsp70	Dsec	4(D)	1	65	46	4	CGCCTCGAATGTTCGCGAAA	T		CGCCT	CGAAT	GTTCG	CGAAA
258	Hsp70	Dsec	4(D)	2	88	69	4	GTTCTCGTTGCTTCGAGAGA	T		GTTCT	CGTTG	CTTCG	AGAGA
259	Hsp70	Dsec	4(D)	3	192	173	4	AGAAAACTCGAGAAATTTCT	G	AGAAA	ACTCG	AGAAA	TTTCT
260	Hsp70	Dsec	4(D)	4	252	238	3	CGAAATTTCTAGAAT	G	CGAAA	TTTCT	AGAAT
261	Hsp70	Dyak	1(A)	1	65	46	4	CGCCTCGAATGTTCGCGAAA	T		CGCCT	CGAAT	GTTCG	CGAAA
262	Hsp70	Dyak	1(A)	2	88	69	4	ATTCTCGTTGCTTCGAGAGA	T		ATTCT	CGTTG	CTTCG	AGAGA
263	Hsp70	Dyak	1(A)	3	193	174	4	AGAAAACTCGAGAAATTTCT	G	AGAAA	ACTCG	AGAAA	TTTCT
264	Hsp70	Dyak	1(A)	4	249	240	2	ATTCTAGAAT	T		ATTCT	AGAAT
265	Hsp70	Dyak	2(B)	1	65	46	4	CGCCTCGAATGTTCGCGAAA	T		CGCCT	CGAAT	GTTCG	CGAAA
266	Hsp70	Dyak	2(B)	2	88	69	4	GTTCTCGTTGCTTCGAGAGA	T		GTTCT	CGTTG	CTTCG	AGAGA
267	Hsp70	Dyak	2(B)	3	194	175	4	AGAAAACTCGAGAAATTTCT	G	AGAAA	ACTCG	AGAAA	TTTCT
268	Hsp70	Dyak	2(B)	4	250	241	2	ATTCTAGAAT	T		ATTCT	AGAAT
269	Hsp70	Dyak	3(C)	1	65	46	4	CGCCTCGAATGTTCGCGAAA	T		CGCCT	CGAAT	GTTCG	CGAAA
270	Hsp70	Dyak	3(C)	2	88	69	4	ATTCTCGTTGCTTCGAGAGA	T		ATTCT	CGTTG	CTTCG	AGAGA
271	Hsp70	Dyak	3(C)	3	193	174	4	AGAAAACTCGAGAAATTTCT	G	AGAAA	ACTCG	AGAAA	TTTCT
272	Hsp70	Dyak	3(C)	4	249	240	2	ATTCTAGAAT	T		ATTCT	AGAAT
273	Hsp70	Dyak	4(D)	1	65	46	4	CGCCTCGAATGTTCGCGAAA	T		CGCCT	CGAAT	GTTCG	CGAAA
274	Hsp70	Dyak	4(D)	2	88	69	4	GTTCTCGTTGCTTCGAGAGA	T		GTTCT	CGTTG	CTTCG	AGAGA
275	Hsp70	Dyak	4(D)	3	193	174	4	AGAAAACTCGAGAAATTTCT	G	AGAAA	ACTCG	AGAAA	TTTCT
276	Hsp70	Dyak	4(D)	4	249	240	2	ATTCTAGAAT	T		ATTCT	AGAAT
277	Hsp70	Dsan	1(A)	1	65	46	4	CGCCTCGAATGTTCGCGAAA	T		CGCCT	CGAAT	GTTCG	CGAAA
278	Hsp70	Dsan	1(A)	2	88	69	4	GCTCTCGTAGCTTCCAGAGA	T		GCTCT	CGTAG	CTTCC	AGAGA
279	Hsp70	Dsan	1(A)	3	121	112	2	ATTCTAGAAT	T		ATTCT	AGAAT
280	Hsp70	Dsan	2(B)	1	65	46	4	CGCCTCGAATGTTCGCGAAA	T		CGCCT	CGAAT	GTTCG	CGAAA
281	Hsp70	Dsan	2(B)	2	88	69	4	GCTCTCGTAGCTTCCAGAGA	T		GCTCT	CGTAG	CTTCC	AGAGA
282	Hsp70	Dsan	2(B)	3	194	175	4	AGAAAACTCGAGAAATTTCT	G	AGAAA	ACTCG	AGAAA	TTTCT
283	Hsp70	Dsan	2(B)	4	250	241	2	ATTCTAGAAT	T		ATTCT	AGAAT
284	Hsp70	Dere	1(A)	1	61	47	3	CGAATGTTCTCGAAA	G	CGAAT	GTTCT	CGAAA
285	Hsp70	Dere	1(A)	2	89	70	4	GTTCTCGTTGCTTCGAGAGA	T		GTTCT	CGTTG	CTTCG	AGAGA
286	Hsp70	Dere	1(A)	3	180	171	2	GGAAATTTCT	G	GGAAA	TTTCT
287	Hsp70	Dere	1(A)	4	233	219	3	CGAATATTCCAGAAT	G	CGAAT	ATTCC	AGAAT
288	Hsp70	Dere	2(B)	1	61	47	3	CGAATGTTCTCGAAA	G	CGAAT	GTTCT	CGAAA
289	Hsp70	Dere	2(B)	2	89	70	4	GTTCTCGTTGCTTCGAGAGA	T		GTTCT	CGTTG	CTTCG	AGAGA
290	Hsp70	Dere	2(B)	3	180	171	2	GGAAATTTCT	G	GGAAA	TTTCT
291	Hsp70	Dere	2(B)	4	233	219	3	CGAATATTCCAGAAT	G	CGAAT	ATTCC	AGAAT
292	Hsp70	Dere	3(C)	1	61	47	3	CGAATGTTCTCGAAA	G	CGAAT	GTTCT	CGAAA
293	Hsp70	Dere	3(C)	2	89	70	4	GTTCTCGTTGCTTCGAGAGA	T		GTTCT	CGTTG	CTTCG	AGAGA
294	Hsp70	Dere	3(C)	3	180	171	2	GGAAATTTCT	G	GGAAA	TTTCT
295	Hsp70	Dere	3(C)	4	233	219	3	CGAATATTCCAGAAT	G	CGAAT	ATTCC	AGAAT
296	Hsp70	Dere	4(D)	1	61	47	3	CGAATGTTCTCGAAA	G	CGAAT	GTTCT	CGAAA
297	Hsp70	Dere	4(D)	2	89	70	4	GTTCTCGTTGCTTCGAGAGA	T		GTTCT	CGTTG	CTTCG	AGAGA
298	Hsp70	Dere	4(D)	3	180	171	2	GGAAATTTCT	G	GGAAA	TTTCT
299	Hsp70	Dere	4(D)	4	233	219	3	CGAATATTACAGAAT	G	CGAAT	ATTAC	AGAAT
300	Hsp70	Dere	5(E)	1	61	47	3	CGTCTCGAACGTTCGCGAAG	T		CGTCT	CGAAC	GTTCG	CGAAG
301	Hsp70	Dere	5(E)	2	89	70	4	GTTCTCGCAGCTTCGAGAGA	T		GTTCT	CGCAG	CTTCG	AGAGA
302	Hsp70	Dere	5(E)	3	176	157	4	AGAAAACTCGAGAAATTTCT	G	AGAAA	ACTCG	AGAAA	TTTCT
303	Hsp70	Dere	5(E)	4	237	223	3	CGAATATTCTTGAAT	G	CGAAT	ATTCT	TGAAT
304	Hsp70	Dere	6(F)	1	61	47	3	CGAATGTTCTCGAAA	G	CGAAT	GTTCT	CGAAA
305	Hsp70	Dere	6(F)	2	89	65	5	GTTCTCGTTGCTTCGAGAGAGTACG	T		GTTCT	CGTTG	CTTCG	AGAGA	GTACG
306	Hsp70	Dere	6(F)	3	168	149	4	GTTCTCGTTGCTTCGAGAGC	T		GTTCT	CGTTG	CTTCG	AGAGC
307	Hsp70	Dere	6(F)	4	315	301	3	CGAATATTCCAGAAT	G	CGAAT	ATTCC	AGAAT
308	Hsp70	Dana	1(A)	1	68	49	4	GAGCAAGAAAGTTCGCGAAG	T		GAGCA	AGAAA	GTTCG	CGAAG
309	Hsp70	Dana	1(A)	2	89	70	4	GTTCTCGAACCTTCGAGGTG	T		GTTCT	CGAAC	CTTCG	AGGTG
310	Hsp70	Dana	1(A)	3	212	193	4	GGAAAAATCGAGAAAATTCT	G	GGAAA	AATCG	AGAAA	ATTCT
311	Hsp70	Dana	1(A)	4	257	243	3	TTTCTAGAAATATCT	T		TTTCT	AGAAA	TATCT
312	Hsp70	Dana	2(B)	1	68	49	4	GAGCAAGAAAGTTCGCGAAG	T		GAGCA	AGAAA	GTTCG	CGAAG
313	Hsp70	Dana	2(B)	2	89	70	4	GTTCTCGAACCTTCGAGGTG	T		GTTCT	CGAAC	CTTCG	AGGTG
314	Hsp70	Dana	2(B)	3	212	193	4	GGAAAAATCGAGAAAATTCT	G	GGAAA	AATCG	AGAAA	ATTCT
315	Hsp70	Dana	2(B)	4	257	243	3	TTTCTAGAAATATCT	T		TTTCT	AGAAA	TATCT
316	Hsp70	Dana	3(C)	1	68	49	4	GAGCAAGAAAGTTCGCGAAG	T		GAGCA	AGAAA	GTTCG	CGAAG
317	Hsp70	Dana	3(C)	2	89	70	4	GTTCTCGAACCTTCGAGGTG	T		GTTCT	CGAAC	CTTCG	AGGTG
318	Hsp70	Dana	3(C)	3	212	193	4	GGAAAAATCGAGAAAATTCT	G	GGAAA	AATCG	AGAAA	ATTCT
319	Hsp70	Dana	3(C)	4	257	243	3	TTTCTAGAAATATCT	T		TTTCT	AGAAA	TATCT
320	Hsp70	Dana	4(D)	1	68	49	4	GAGCAAGAAAGTTCGCGAAG	T		GAGCA	AGAAA	GTTCG	CGAAG
321	Hsp70	Dana	4(D)	2	89	70	4	GTTCTCGAACCTTCGAGGTG	T		GTTCT	CGAAC	CTTCG	AGGTG
322	Hsp70	Dana	4(D)	3	199	180	4	GGAAAAATCGAGAAACTTCT	G	GGAAA	AATCG	AGAAA	CTTCT
323	Hsp70	Dana	4(D)	4	234	225	2	TTTCTAGAAA	T		TTTCT	AGAAA
324	Hsp70	Dana	5(E)	1	68	49	4	GAGCAAGAAAGTTCGCGAAG	T		GAGCA	AGAAA	GTTCG	CGAAG
325	Hsp70	Dana	5(E)	2	89	70	4	GTTCTCGAACCTTCGAGGTG	T		GTTCT	CGAAC	CTTCG	AGGTG
326	Hsp70	Dana	5(E)	3	208	189	4	AGAGAAGTCGAGAAAATTCT	G	AGAGA	AGTCG	AGAAA	ATTCT
327	Hsp70	Dana	5(E)	4	253	239	3	TTTCCAGAAATATCT	T		TTTCC	AGAAA	TATCT
328	Hsp70	Dpse	1(A)	1	65	51	3	GCTCTCGAAGTTTCG	T		GCTCT	CGAAG	TTTCG
329	Hsp70	Dpse	1(A)	2	88	69	4	ATTCAAGATATTTCTAGAAG	T		ATTCA	AGATA	TTTCT	AGAAG
330	Hsp70	Dpse	1(A)	3	210	191	4	GGAAAAGTCGAGAAATTTCG	G	GGAAA	AGTCG	AGAAA	TTTCG
331	Hsp70	Dpse	1(A)	4	289	275	3	CGAATTTTCTAGATT	G	CGAAT	TTTCT	AGATT
332	Hsp70	Dpse	2(B)	1	65	51	3	GCTCTCGAAGTTTCG	T		GCTCT	CGAAG	TTTCG
333	Hsp70	Dpse	2(B)	2	88	69	4	ATTCAAGATATTTCTAGAAG	T		ATTCA	AGATA	TTTCT	AGAAG
334	Hsp70	Dpse	2(B)	3	210	191	4	GGAAAAGTCGAGAAATTTCG	G	GGAAA	AGTCG	AGAAA	TTTCG
335	Hsp70	Dpse	2(B)	4	289	275	3	CGAATTTTCTAGATT	G	CGAAT	TTTCT	AGATT
336	Hsp70	Dper	1(A)	1	65	51	3	GCTCTCGAAGTTTCG	T		GCTCT	CGAAG	TTTCG
337	Hsp70	Dper	1(A)	2	88	69	4	ATTCAAGATATTTCTAGAAG	T		ATTCA	AGATA	TTTCT	AGAAG
338	Hsp70	Dper	1(A)	3	210	191	4	GGAAAAGTCGAGAAATTTCG	G	GGAAA	AGTCG	AGAAA	TTTCG
339	Hsp70	Dper	1(A)	4	289	275	3	CGAATTTTCTAGATT	G	CGAAT	TTTCT	AGATT
340	Hsp70	Dper	2(B)	1	65	51	3	GCTCTCGAAGTTTCG	T		GCTCT	CGAAG	TTTCG
341	Hsp70	Dper	2(B)	2	88	69	4	ATTCAAGATATTTCTAGAAG	T		ATTCA	AGATA	TTTCT	AGAAG
342	Hsp70	Dper	2(B)	3	210	191	4	GGAAAAGTCGAGAAATTTCG	G	GGAAA	AGTCG	AGAAA	TTTCG
343	Hsp70	Dper	2(B)	4	289	275	3	CGAATTTTCTAGATT	G	CGAAT	TTTCT	AGATT
344	Hsp70	Dwil	1(A)	1	65	46	4	CGTCTCGAAGTTTCCGAAAG	T		CGTCT	CGAAG	TTTCC	GAAAG
345	Hsp70	Dwil	1(A)	2	94	70	5	CGATTGTTCGAGAGAGTTCGCGAAG	G	CGATT	GTTCG	AGAGA	GTTCG	CGAAG
346	Hsp70	Dwil	1(A)	3	164	155	2	CGAAATTTCC	G	CGAAA	TTTCC
347	Hsp70	Dwil	1(A)	4	248	234	3	TGAATCTTCTAGAGC	G	TGAAT	CTTCT	AGAGC
348	Hsp70	Dwil	2(B)	1	65	46	4	CGTCTCGAAGTTTCCGAAAG	T		CGTCT	CGAAG	TTTCC	GAAAG
349	Hsp70	Dwil	2(B)	2	94	70	5	CGATTGTTCGAGAGAGTTCGCGAAG	G	CGATT	GTTCG	AGAGA	GTTCG	CGAAG
350	Hsp70	Dwil	2(B)	3	206	187	4	AGATACTTCAAGAAAATACC	G	AGATA	CTTCA	AGAAA	ATACC
351	Hsp70	Dwil	2(B)	4	244	230	3	TGAATATACTAGTTC	G	TGAAT	ATACT	AGTTC
352	Hsp70	Dwil	3(C)	1	64	45	4	CGTCTCGAAATTTCGAAAAG	T		CGTCT	CGAAA	TTTCG	AAAAG
353	Hsp70	Dwil	3(C)	2	93	69	5	CGATTGTTCGAGAGAGTGCGAGAAG	G	CGATT	GTTCG	AGAGA	GTGCG	AGAAG
354	Hsp70	Dwil	3(C)	3	168	149	4	AGATACTTCGAGAAAATTCT	G	AGATA	CTTCG	AGAAA	ATTCT
355	Hsp70	Dwil	3(C)	4	262	248	3	TGAGTTTTCCAAAAT	G	TGAGT	TTTCC	AAAAT
356	Hsp70	Dmoj	1(A)	1	65	51	3	CGTCGAGAAATTTCG	T		CGTCG	AGAAA	TTTCG
357	Hsp70	Dmoj	1(A)	2	88	69	4	AGTCGAGTCGATTCGAGAGA	T		AGTCG	AGTCG	ATTCG	AGAGA
358	Hsp70	Dmoj	1(A)	3	176	157	4	AGAATATTCGAGAATATTCC	G	AGAAT	ATTCG	AGAAT	ATTCC
359	Hsp70	Dmoj	1(A)	4	266	252	3	GGAATATGTATGTAT	G	GGAAT	ATGTA	TGTAT
360	Hsp70	Dmoj	2(B)	1	65	51	3	CGTCGAGAAATTTCG	T		CGTCG	AGAAA	TTTCG
361	Hsp70	Dmoj	2(B)	2	88	69	4	ATTCGAGTCGATTCGAGAGA	T		ATTCG	AGTCG	ATTCG	AGAGA
362	Hsp70	Dmoj	2(B)	3	183	169	3	CTTCGAGAAAATTCC	T		CTTCG	AGAAA	ATTCC
363	Hsp70	Dmoj	2(B)	4	269	255	3	TGAATTTTCTAGAAA	G	TGAAT	TTTCT	AGAAA
364	Hsp70	Dmoj	3(C)	1	65	51	3	CGTCGAGAAATTTCG	T		CGTCG	AGAAA	TTTCG
365	Hsp70	Dmoj	3(C)	2	88	69	4	ATTCGAGTCGATTCGAGAGA	T		ATTCG	AGTCG	ATTCG	AGAGA
366	Hsp70	Dmoj	3(C)	3	183	169	3	CTTCGAGAAAATTCC	T		CTTCG	AGAAA	ATTCC
367	Hsp70	Dmoj	3(C)	4	269	255	3	TGAATTTTCTAGAAA	G	TGAAT	TTTCT	AGAAA
368	Hsp70	Dmoj	4(D)	1	65	51	3	CGTCGAGAAATTTCG	T		CGTCG	AGAAA	TTTCG
369	Hsp70	Dmoj	4(D)	2	88	69	4	ATTCGAGTCGATTCGAGAGA	T		ATTCG	AGTCG	ATTCG	AGAGA
370	Hsp70	Dmoj	4(D)	3	183	169	3	CTTCGAGAAAATTCC	T		CTTCG	AGAAA	ATTCC
371	Hsp70	Dmoj	4(D)	4	269	255	3	TGAATTTTCTAGAAA	G	TGAAT	TTTCT	AGAAA
372	Hsp70	Dmoj	5(E)	1	65	51	3	CGTCGAGAAATTTCG	T		CGTCG	AGAAA	TTTCG
373	Hsp70	Dmoj	5(E)	2	88	69	4	AGTCGAGTCGATTCGAGAGA	T		AGTCG	AGTCG	ATTCG	AGAGA
374	Hsp70	Dmoj	5(E)	3	176	157	4	GGAATATTCTAGAATATTCC	G	GGAAT	ATTCT	AGAAT	ATTCC
375	Hsp70	Dmoj	5(E)	4	270	256	3	CGAATTTTCTAGATA	G	CGAAT	TTTCT	AGATA
376	Hsp70	Dmoj	6(F)	1	65	51	3	CGTCGAGAAATTTCG	T		CGTCG	AGAAA	TTTCG
377	Hsp70	Dmoj	6(F)	2	88	69	4	ATTCGAGTCGATTCGAGAGA	T		ATTCG	AGTCG	ATTCG	AGAGA
378	Hsp70	Dmoj	6(F)	3	183	169	3	CTTCGAGAAAATTCC	T		CTTCG	AGAAA	ATTCC
379	Hsp70	Dmoj	6(F)	4	269	255	3	TGAATTTTCTAGAAA	G	TGAAT	TTTCT	AGAAA
380	Hsp70	Dvir	1(A)	1	65	46	4	CGTCGAGAAAATTCGAAAAG	T		CGTCG	AGAAA	ATTCG	AAAAG
381	Hsp70	Dvir	1(A)	2	89	70	4	GTTCGACGCGTTTCGAGAAG	T		GTTCG	ACGCG	TTTCG	AGAAG
382	Hsp70	Dvir	1(A)	3	167	153	3	CTTCTAGAAAAATCG	T		CTTCT	AGAAA	AATCG
383	Hsp70	Dvir	1(A)	4	261	247	3	TGAATTTTCTAGAAT	G	TGAAT	TTTCT	AGAAT
384	Hsp70	Dvir	2(B)	1	65	46	4	CGTCGAGAAATTTCGAAAAG	T		CGTCG	AGAAA	TTTCG	AAAAG
385	Hsp70	Dvir	2(B)	2	89	70	4	GTTCGACGCGTTTCGAGAAG	T		GTTCG	ACGCG	TTTCG	AGAAG
386	Hsp70	Dvir	2(B)	3	167	153	3	GCTCTAGAAAAATCG	T		GCTCT	AGAAA	AATCG
387	Hsp70	Dvir	2(B)	4	281	267	3	TGAATTTTCTATAAT	G	TGAAT	TTTCT	ATAAT
388	Hsp70	Dvir	3(C)	1	65	46	4	CGTCGAGAAATTTCGAAAAG	T		CGTCG	AGAAA	TTTCG	AAAAG
389	Hsp70	Dvir	3(C)	2	89	70	4	GTTCGACGCGTTTCGAGAAG	T		GTTCG	ACGCG	TTTCG	AGAAG
390	Hsp70	Dvir	3(C)	3	167	153	3	GCTCTAGAAAAATCG	T		GCTCT	AGAAA	AATCG
391	Hsp70	Dvir	3(C)	4	281	267	3	TGAATTTTCTATAAT	G	TGAAT	TTTCT	ATAAT
392	Hsp70	Dvir	4(D)	1	65	46	4	CGTCGAGAAATTTCGAAAAG	T		CGTCG	AGAAA	TTTCG	AAAAG
393	Hsp70	Dvir	4(D)	2	89	70	4	GTTCGACGCGTTTCGAGAAG	T		GTTCG	ACGCG	TTTCG	AGAAG
394	Hsp70	Dvir	4(D)	3	167	153	3	GCTCTAGAAAAATCG	T		GCTCT	AGAAA	AATCG
395	Hsp70	Dvir	4(D)	4	281	267	3	TGAATTTTCTATAAT	G	TGAAT	TTTCT	ATAAT
396	Hsp70	Dvir	6(F)	1	65	46	4	CGTCGAGAAATTTCGAAAAG	T		CGTCG	AGAAA	TTTCG	AAAAG
397	Hsp70	Dvir	6(F)	2	89	70	4	GTTCGACGCGTTTCGAGAAG	T		GTTCG	ACGCG	TTTCG	AGAAG
398	Hsp70	Dvir	6(F)	3	167	153	3	GCTCTAGAAAAATCG	T		GCTCT	AGAAA	AATCG
399	Hsp70	Dvir	6(F)	4	281	267	3	TGAATTTTCTATAAT	G	TGAAT	TTTCT	ATAAT
400	Hsp70	Dvir	7(G)	1	65	46	4	CGTCGAGAAATTTCGAAAAG	T		CGTCG	AGAAA	TTTCG	AAAAG
401	Hsp70	Dvir	7(G)	2	89	70	4	GTTCGACGCGTTTCGAGAAG	T		GTTCG	ACGCG	TTTCG	AGAAG
402	Hsp70	Dvir	7(G)	3	167	153	3	GCTCTAGAAAAATCG	T		GCTCT	AGAAA	AATCG
403	Hsp70	Dvir	7(G)	4	283	269	3	TGAATTTTCTAGAAT	G	TGAAT	TTTCT	AGAAT
404	Hsp70	Dgri	1(A)	1	65	46	4	CATCTAGAAATTTCGGAAAG	T		CATCT	AGAAA	TTTCG	GAAAG
405	Hsp70	Dgri	1(A)	2	89	70	4	GTTCGACTCGTTTCGAGAAG	T		GTTCG	ACTCG	TTTCG	AGAAG
406	Hsp70	Dgri	1(A)	3	209	195	3	CTTCGAGAAAACTCG	T		CTTCG	AGAAA	ACTCG
407	Hsp70	Dgri	1(A)	4	306	292	3	TGAACTTTCTAGAAT	G	TGAAC	TTTCT	AGAAT
408	Hsp70	Dgri	2(B)	1	65	46	4	CATCTAGAAATTTCGGAAAG	T		CATCT	AGAAA	TTTCG	GAAAG
409	Hsp70	Dgri	2(B)	2	89	70	4	GTTCGACTCGTTTCGAGAAG	T		GTTCG	ACTCG	TTTCG	AGAAG
410	Hsp70	Dgri	2(B)	3	209	195	3	CTTCGAGAAAACTCG	T		CTTCG	AGAAA	ACTCG
411	Hsp70	Dgri	2(B)	4	306	292	3	TGAACTTTCTAGAAT	G	TGAAC	TTTCT	AGAAT
412	Hsp70	Dgri	3(C)	1	65	46	4	CATCTAGAAATTTCGGAAAG	T		CATCT	AGAAA	TTTCG	GAAAG
413	Hsp70	Dgri	3(C)	2	89	70	4	GTTCGACTCGTTTCGAGAAG	T		GTTCG	ACTCG	TTTCG	AGAAG
414	Hsp70	Dgri	3(C)	3	209	195	3	CTTCGAGAAAACTCG	T		CTTCG	AGAAA	ACTCG
415	Hsp70	Dgri	3(C)	4	306	292	3	TGAACTTTCTAGAAT	G	TGAAC	TTTCT	AGAAT
416	hsp83	Dmel	1	1	86	47	8	CATCCAGAAGCCTCTAGAAGTTTCTAGAGACTTCCAGTTC	T		CATCC	AGAAG	CCTCT	AGAAG	TTTCT	AGAGA	CTTCC	AGTTC
417	hsp83	Dsim	1	1	86	47	8	CAACCAGAAGCCTCTAGAAGTTTCTAGAGTCTTCGAGTTC	T		CAACC	AGAAG	CCTCT	AGAAG	TTTCT	AGAGT	CTTCG	AGTTC
418	hsp83	Dsec	1	1	86	47	8	CAACCAGAAGCCTCTAGAAGTTTCTAGAGTCTTCGAGTTC	T		CAACC	AGAAG	CCTCT	AGAAG	TTTCT	AGAGT	CTTCG	AGTTC
419	hsp83	Dyak	1	1	86	47	8	CATCTGGAAGCCTCTAGAAGTTTCTAGACTCTTCGAGTTC	T		CATCT	GGAAG	CCTCT	AGAAG	TTTCT	AGACT	CTTCG	AGTTC
420	hsp83	Dsan	1	1	86	47	8	CATCTGGAAGCCTCTAGAAGTTTCTAGACTCTTCGAGTTC	T		CATCT	GGAAG	CCTCT	AGAAG	TTTCT	AGACT	CTTCG	AGTTC
421	hsp83	Dere	1	1	86	52	7	CATCTGGAAGACTCTAGAAGTTTCTGGACGCTTCG	T		CATCT	GGAAG	ACTCT	AGAAG	TTTCT	GGACG	CTTCG
422	hsp83	Dana	1	1	95	66	6	AGAAAGATCTGGAATCGTCTAGAAGCTTCG	G	AGAAA	GATCT	GGAAT	CGTCT	AGAAG	CTTCG
423	hsp83	Dpse	1	1	87	53	7	ATTCTCGTAGCCTCTAGAAACGTCTAGAAAATTCT	T		ATTCT	CGTAG	CCTCT	AGAAA	CGTCT	AGAAA	ATTCT
424	hsp83	Dper	1	1	87	53	7	ATTCTCGTAGCCTCTAGAAACGTCTAGAAAATTCT	T		ATTCT	CGTAG	CCTCT	AGAAA	CGTCT	AGAAA	ATTCT
425	hsp83	Dwil	1	1	86	52	7	ATTCTCGAACAGTCTAGAACATTCTTGAAATTTCT	T		ATTCT	CGAAC	AGTCT	AGAAC	ATTCT	TGAAA	TTTCT
426	hsp83	Dmoj	1	1	85	51	7	CGACTAGATGTTTCTCGAAAAATCTAGAAGCTTCG	T		CGACT	AGATG	TTTCT	CGAAA	AATCT	AGAAG	CTTCG
427	hsp83	Dmoj	1	2	174	150	5	TTTCTAGAACATTACAGAAACATCG	T		TTTCT	AGAAC	ATTAC	AGAAA	CATCG
428	hsp83	Dvir	1	1	85	46	8	CGACGAGAAGTCTCTAGAAGTGTCTAGAAGTTTCGAGGCA	T		CGACG	AGAAG	TCTCT	AGAAG	TGTCT	AGAAG	TTTCG	AGGCA
429	hsp83	Dvir	1	2	174	150	5	TTTCTAGAACTTTACAAAACCATCG	T		TTTCT	AGAAC	TTTAC	AAAAC	CATCG
430	hsp83	Dgri	1	1	86	52	7	GGACTAGAAGGCTCTAGAAGCGTCTAGAAGTTTCA	T		GGACT	AGAAG	GCTCT	AGAAG	CGTCT	AGAAG	TTTCA
431	hsp83	Dgri	1	2	175	151	5	CTTCTAGAACATTACAAGTTCAACC	T		CTTCT	AGAAC	ATTAC	AAGTT	CAACC
